# Supplementary material for: A large fraction of neocortical myelin ensheathes axons of local inhibitory neurons
Source: eLife journal article supplement (doi:10.7554/elife.15784), 2016-07-06
Supplement: supp [file elife-15784-supp-v1.zip]

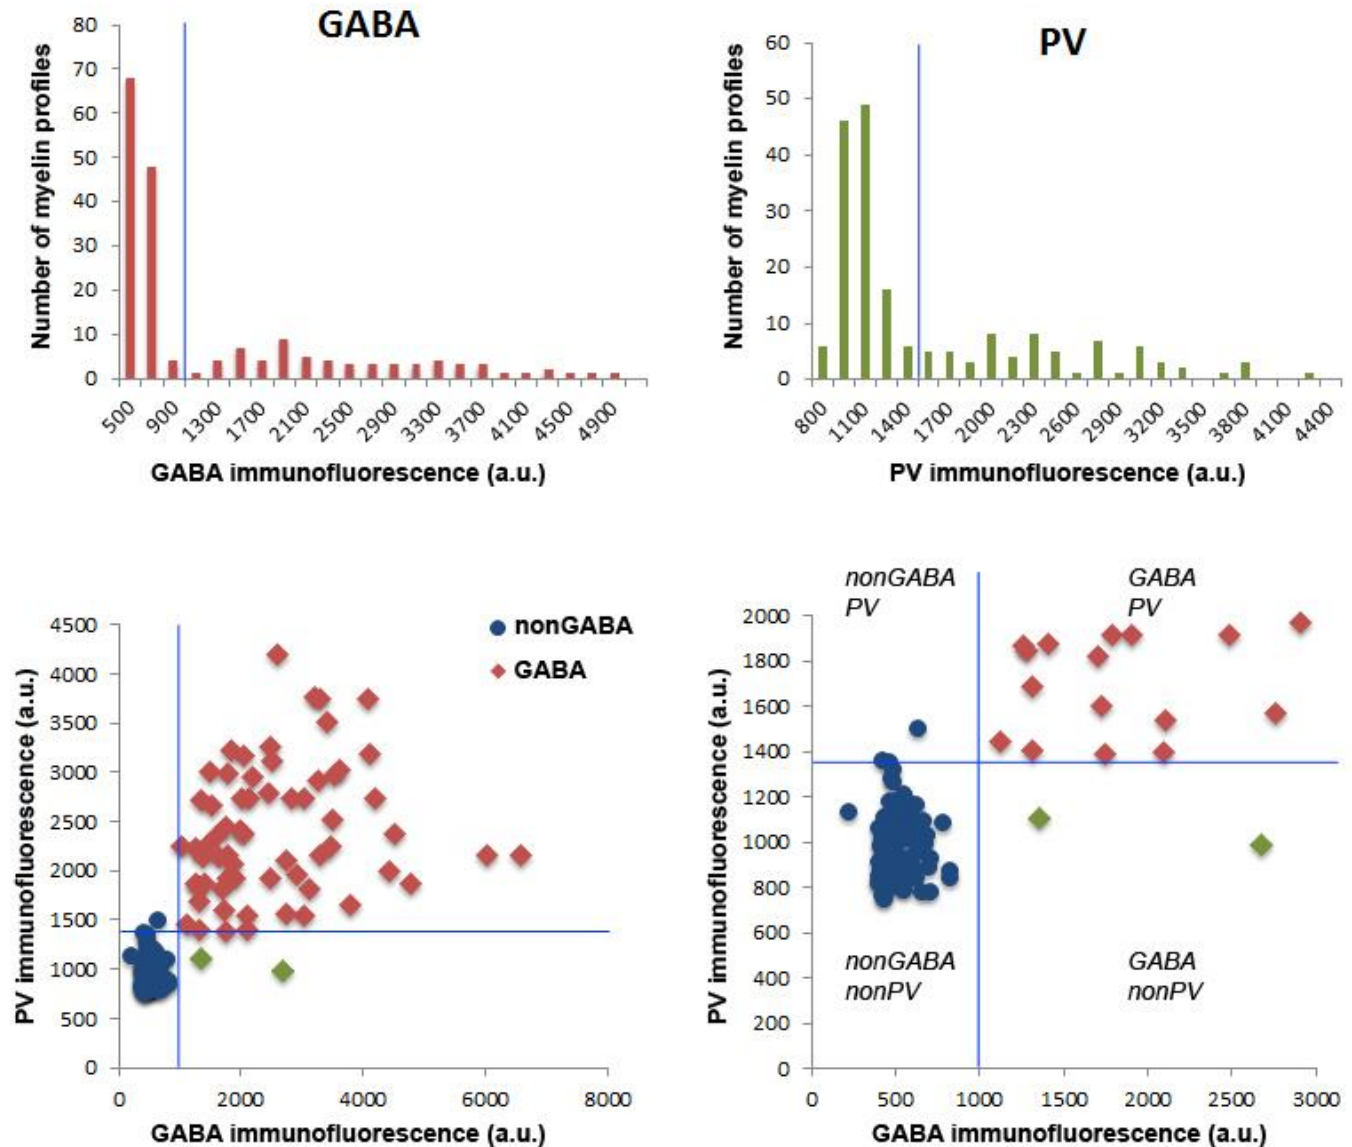

**Figure 3 – figure supplement 1.** GABA and PV immunoreactivity of myelinated axons. Top, Distribution of GABA and PV immunofluorescence within cortical myelinated axons. Because of the inherent variability of immunolabeling intensity and image acquisition parameters, comparisons were always done on sections from the same coverslip, which were stained and imaged at the same time. Measurements from layers 4 and 5 of mouse cortex from one coverslip are presented in the figure. The threshold for GABA and PV immunofluorescence is indicated by the blue lines. Bottom, Scatterplot of GABA and PV immunofluorescence from the same experiment, showing three classified populations of myelinated axons: GABA negative in blue, GABA and PV positive in red, and GABA positive but PV negative axonal profiles in green.
