# Supplementary material for: A large fraction of neocortical myelin ensheathes axons of local inhibitory neurons
Source: eLife journal article supplement (doi:10.7554/elife.15784), 2016-07-06
Supplement: supp [file elife-15784-supp-v1.zip]

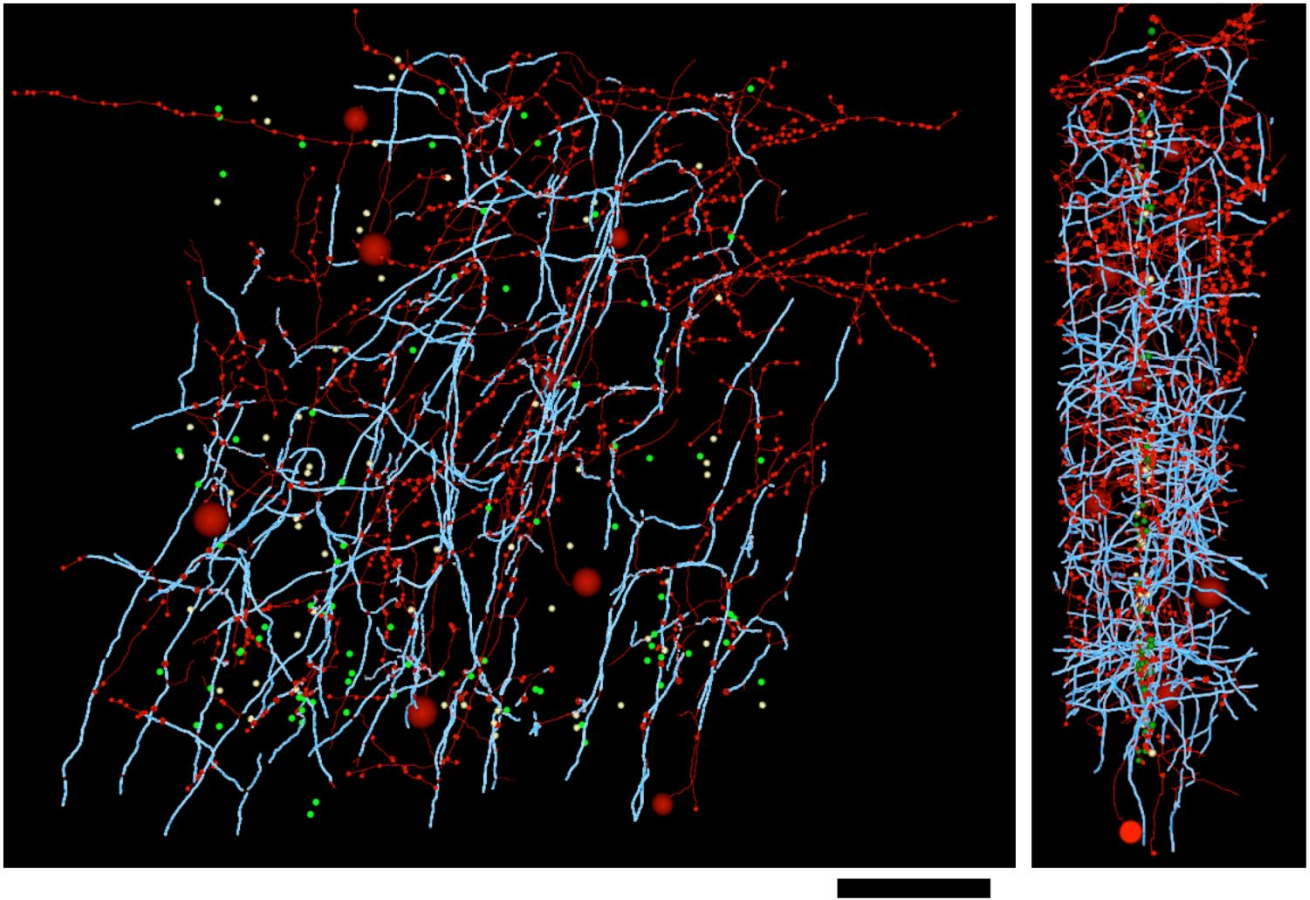

**Figure 2 – figure supplement 2.** Distribution of myelin (cyan) on axon fragments (red) categorized as inhibitory. Left, frontal view. Right, side view. Large red spheres: inhibitory somata reached during categorization of axon fragments; medium-sized spheres indicate the position of tracing seeds of categorized axon fragments (green: excitatory; red: inhibitory; yellow: unclassifiable). Smallest red spheres indicate the position of synapses made by the inhibitory axon fragments. Scale bar ~50  $\mu\text{m}$ .
