# Supplementary material for: A large fraction of neocortical myelin ensheathes axons of local inhibitory neurons
Source: eLife journal article supplement (doi:10.7554/elife.15784), 2016-07-06
Supplement: supp [file elife-15784-supp-v1.zip]

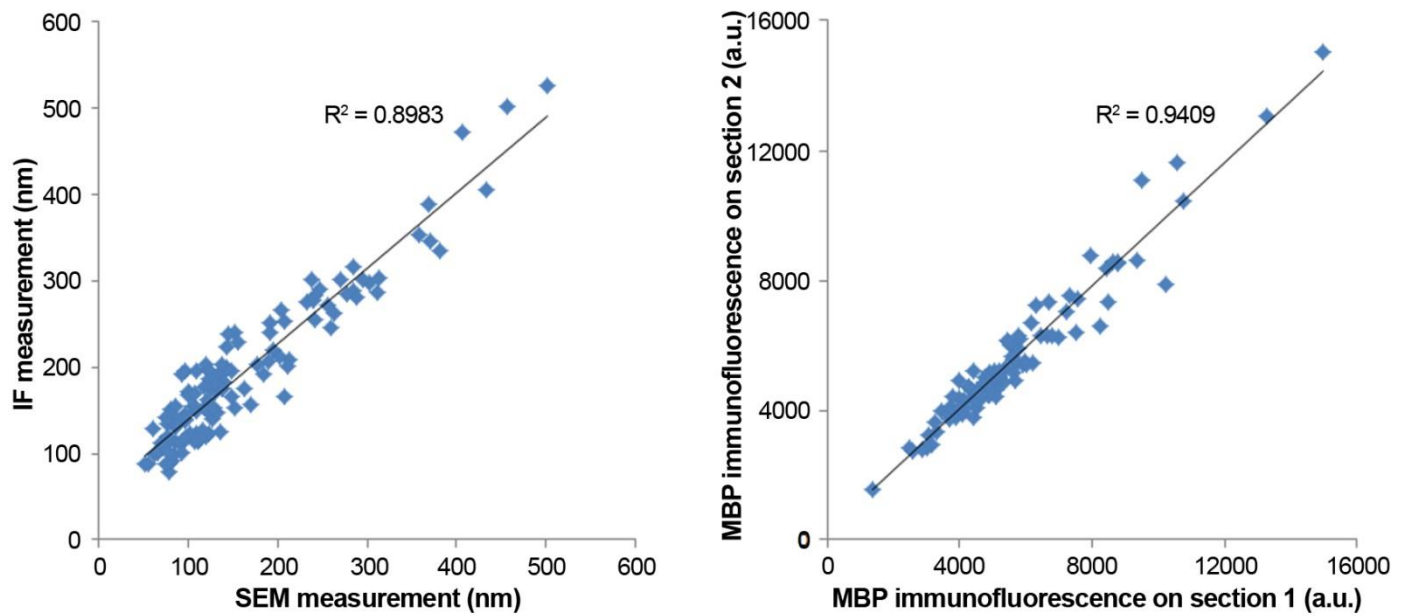

**Figure 1 – figure supplement 2. MBP antibody performance.** (A) Myelin thickness as measured from IF data and SEM data. Myelin thickness was measured on the same sections using either immunofluorescence for MBP or ultrastructurally defined myelin on SEM images using a dataset from a previous study<sup>34</sup> (N=125 axonal profiles). There is a strong correlation between the two measurements ( $R^2=0.9$ ), which allows the use of MBP immunofluorescence for more efficient sampling. (B) Consistency of MBP immunolabel. Correlation of MBP immunofluorescence of the same myelin sheath measured on two adjacent ultrathin sections (N=100 axonal profiles).
