# Supplementary material for: A large fraction of neocortical myelin ensheathes axons of local inhibitory neurons
Source: eLife journal article supplement (doi:10.7554/elife.15784), 2016-07-06
Supplement: supp [file elife-15784-supp-v1.zip]

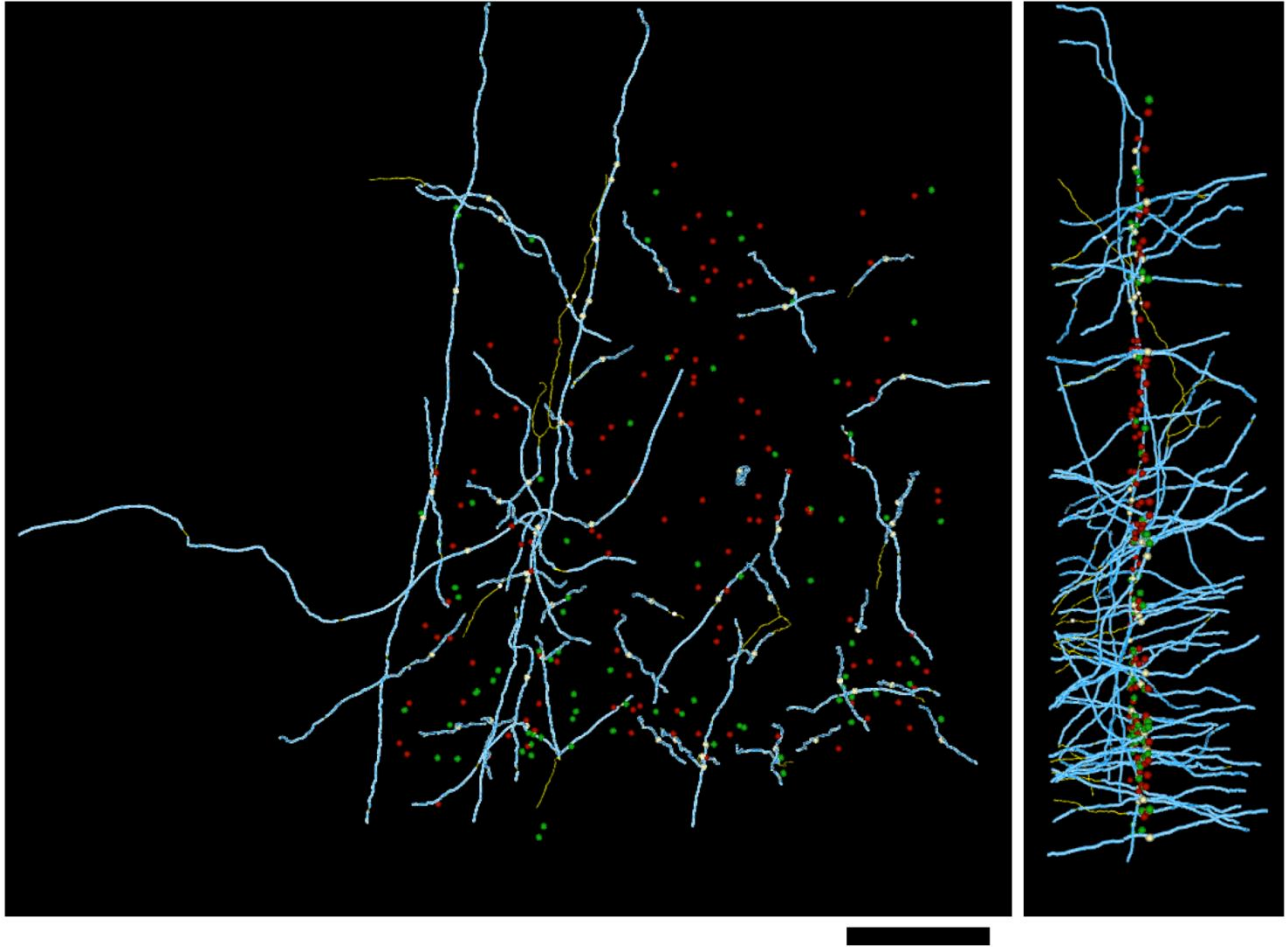

**Figure 2 – figure supplement 3.** Distribution of myelin (cyan) on axon fragments (yellow) that could not be categorized, due to an absence of synapses in the EM-imaged volume. Left, frontal view. Right, side view. Large green spheres: excitatory somata; medium-sized spheres indicate the position of tracing seeds of categorized axon fragments (green: excitatory; red: inhibitory; yellow: unclassifiable). Scale bar ~50  $\mu\text{m}$ .
